# Supplementary material for: Quantitative analysis of s-PB/SBR blend dispersion morphology using computer image processing-assisted Raman spectroscopic techniques
Source: Royal Society of Chemistry journal article supplement (doi:10.1039/d2ay01271e), 2022-01-01
Supplement: d2ay01271e1.pdf [file d2ay01271e1.pdf]

ESI for

**Quantitative analysis of s-PB/SBR blends dispersion morphology using computer  
image processing-assisted Raman spectroscopic technologies**

Meng Ge <sup>a,d</sup>, Junqing Wu <sup>b,d</sup>, Qingqing Hong <sup>c,d</sup>, Lifeng Zhang <sup>a,d,\*</sup>, Ming Zhang <sup>b,d</sup>,

Lei Yu <sup>b,d,\*</sup>

<sup>a</sup> Department of Electrical and Electronic Engineering, Kyushu Institute of  
Technology, Kitakyushu, Fukuoka 8048550, Japan

<sup>b</sup> School of Chemistry and Chemical Engineering, Yangzhou University, Yangzhou,  
Jiangsu 225002, China

<sup>c</sup> School of Information Engineering, Yangzhou University, Yangzhou, Jiangsu  
225002, China

<sup>d</sup> Joint Laboratory of Yangzhou University and Kyushu Institute of Technology,  
Yangzhou University, Yangzhou, Jiangsu 225002, China

Fax : +86-514-87979516; Tel: +86-514-87979516; Emails: [zhang@elcs.kyutech.ac.jp](mailto:zhang@elcs.kyutech.ac.jp)

(L. Zhang) ; [yulei@yzu.edu.cn](mailto:yulei@yzu.edu.cn) (L. Yu).

**CONTENTS**

Computer programs to quantify homogeneity.....S2

## 1. Computer programs to quantify homogeneity

```
import cv2

from numpy import *

import numpy as np

import math

import random

from random import uniform, randint

def findrate(square):

    h, w = square.shape[:2]

    s = 0.0

    amount = 0.0

    for i in range(0,h):

        for j in range(0,w):

            amount += 1

            if square[i,j] == 255:

                s = s+1

    rate = s/amount

    return rate

def meanrate(fdomain, r=20):

    h, w = fdomain.shape[:2]

    coord = 0

    coor = 0

    for i in range(0,h-r+1,10):

        for j in range(0, w-r+1, 10):

            coor += 1

    sample_rate = np.empty(coor)
```

```

for i in range(0,h-r+1,10):
    for j in range(0, w-r+1, 10):

        sample = fdomain[i:i+r-1, j:j+r-1]
        sample_rate[coord] = findrate(sample)

        coord = coord + 1

var = np.cov(sample_rate)
a = findrate(fdomain)
k = 100*(math.sqrt(var))/a
return k

img = cv2.imread('image path')

cv2.namedWindow('Original', 0)
cv2.resizeWindow('Original',500,500)
cv2.imshow('Original', img)
imag = cv2.cvtColor(img, cv2.COLOR_BGR2HSV)
rows, cols = imag.shape[:2]
lower_red_1 = np.array([0,50,50])
upper_red_1 = np.array([34,255,255])
mask_1 = cv2.inRange(imag, lower_red_1, upper_red_1)

lower_red_2 = np.array([160,50,50])
upper_red_2 = np.array([180,255,255])
mask_2 = cv2.inRange(imag, lower_red_2, upper_red_2)
nimg = np.zeros((rows, cols))

```

```
for m in range(0,rows):
    for n in range(0,cols):
        nimg[m,n] = mask_1[m,n] or mask_2[m,n]

homo = meanrate(mask_1)
print homo
cv2.namedWindow('Final', 0)
cv2.resizeWindow('Final',500,500)
cv2.imshow('Final', nimg)
cv2.waitKey(0)
cv2.destroyAllWindows()
```
